# Supplementary material for: Research on the Comparison Properties of PDMS Specimens Demolding Processes and the Mechanical Performance of Hollow-Solid Ratios of Flexible Telescopic Rods
Source: MDPI journal article supplement (doi:10.3390/mi14061105), 2023-05-24
Supplement: s1 [file s1]

## **Supporting Information**

**Research on the comparison properties of PDMS Specimens Demolding Processes and the mechanical Performance of Hollow-Solid Ratios of flexible telescopic rods**

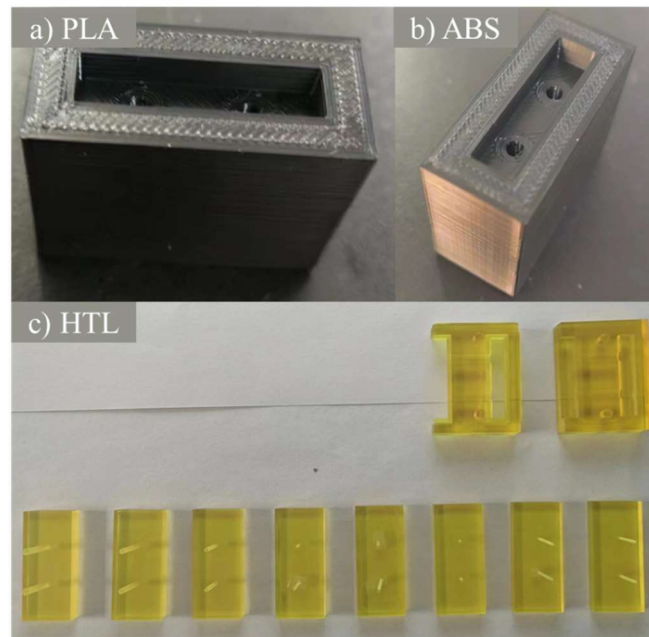

Figure S1. (a, b, c) respectively representing PLA-mold, ABS-mold, HTL-mold.

Table S1. Mechanical parameters of PDMS.

| Material    | Density (kg/m <sup>3</sup> ) | Poisson's ratio | Young's modulus (MPa) |
|-------------|------------------------------|-----------------|-----------------------|
| Sylgard 184 | 0.97                         | 0.49            | 1.47                  |

Table S2. The test-bar size difference between design and fabrication.

| Exp.no. | Sample hollow rod height: (mm) |         |            |                    | Sample hollow rod radius: (mm) |         |            |                    | Mold-material |
|---------|--------------------------------|---------|------------|--------------------|--------------------------------|---------|------------|--------------------|---------------|
|         | Designed                       | Molding | Difference | %Increase/decrease | Designed                       | Molding | Difference | %Increase/decrease |               |
| 1       | 0                              | 0       | 0          | 0                  | 0.5                            | 0.49    | 0.01       | -2%                | HTL           |
| 2       | 3.75                           | 3.74    | 0.01       | -0.27%             | 0.5                            | 0.49    | 0.01       | -2%                | HTL           |
| 3       | 7.5                            | 7.49    | 0.01       | -0.13%             | 0.5                            | 0.49    | 0.01       | -2%                | HTL           |
| 4       | 11.25                          | 11.23   | 0.02       | -0.18%             | 0.5                            | 0.5     | 0          | 0                  | HTL           |
| 5       | 15                             | 14.97   | 0.03       | -0.2%              | 0.5                            | 0.49    | 0.01       | -2%                | HTL           |
| 6       | 7.5                            | 7.48    | 0.02       | -0.27%             | 0.6                            | 0.59    | 0.01       | -1.67%             | HTL           |
| 7       | 7.5                            | 7.49    | 0.01       | -0.13%             | 0.7                            | 0.68    | 0.02       | -2.86%             | HTL           |
| 8       | 7.5                            | 7.51    | 0.01       | +0.13%             | 0.8                            | 0.78    | 0.02       | -2.5%              | HTL           |
| 9       | 7.5                            | 7.61    | 0.11       | +1.46%             | 0.5                            | 0.55    | 0.05       | 10%                | ABS           |
| 10      | 7.5                            | 7.63    | 0.13       | +1.72%             | 0.5                            | 0.57    | 0.07       | 14%                | PLA           |

Table S3. Material models of PDMS and their corresponding material constants obtained from experimental data.

| Material model | Material constants                | PDMS-AB(base polymer:curing agent) |
|----------------|-----------------------------------|------------------------------------|
| Mooney-Rivlin  | C01(MPa)                          | -1.6047                            |
|                | C10(MPa)                          | 2.0019                             |
| Neo-Hookean    | Initial shear Modulus $\mu$ (MPa) | 1.1994                             |
|                | Incompressibility parameter $D_1$ | 0                                  |
| Yeoh           | Incompressibility parameter $D_1$ | 0                                  |
|                | C10(MPa)                          | 0.59968                            |
| Odgen          | Incompressibility parameter $D_1$ | 0                                  |
|                | $\alpha$                          | 6.0593                             |
|                | $\mu$ (MPa)                       | 0.24937                            |

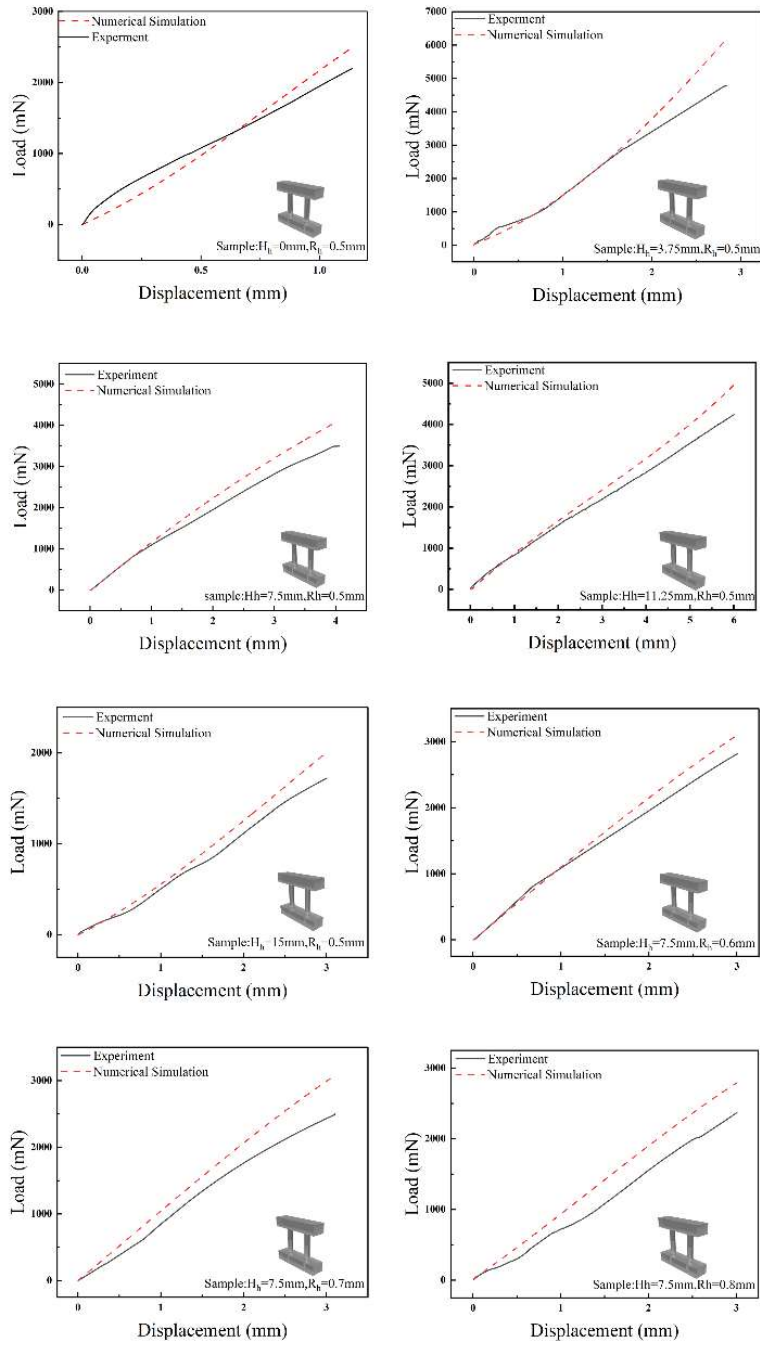

Figure S2. Experimental load-displacement curves of telescopic rod of different heights of hollow rod.

- (a)  $H_h = 0 \text{ mm}$ ,  $R_h = 0.5 \text{ mm}$ , (b)  $H_h = 3.75 \text{ mm}$ ,  $R_h = 0.5 \text{ mm}$ . (c)  $H_h = 7.5 \text{ mm}$ ,  $R_h = 0.5 \text{ mm}$ . (d)  $H_h = 11.25 \text{ mm}$ ,  $R_h = 0.5 \text{ mm}$ . (e)  $H_h = 15 \text{ mm}$ ,  $R_h = 0.5 \text{ mm}$ . (f)  $H_h = 7.5 \text{ mm}$ ,  $R_h = 0.6 \text{ mm}$ . (g)  $H_h = 7.5 \text{ mm}$ ,  $R_h = 0.7 \text{ mm}$ . (h)  $H_h = 7.5 \text{ mm}$ ,  $R_h = 0.8 \text{ mm}$ .

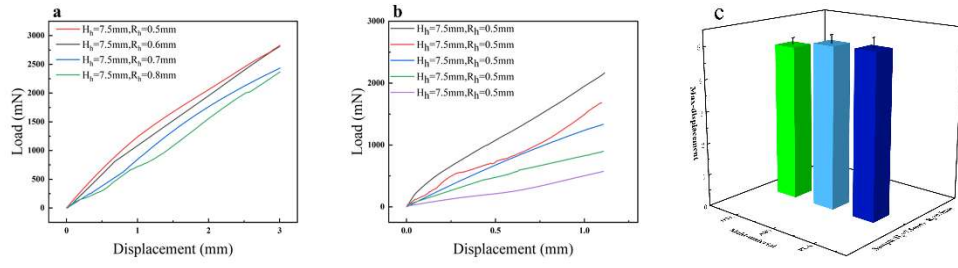

Figure S3. (a) Comparison of experimental load-displacement curves of hollow telescopic rods of different radii.  
 (b) Comparison of experimental load-displacement curves of hollow telescopic rods of different heights.  
 (c) Comparison of maximum stretch-displacement of specimens produced via various turn-flipped-molding processes.

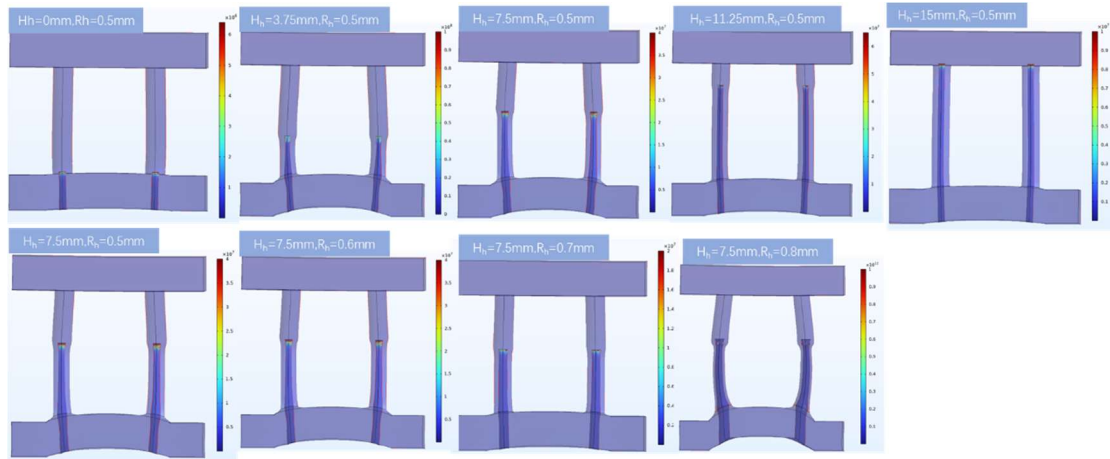

Figure S4. strain of FEA-cloud-map.
